# Supplementary material for: Sialic-Acid-Related Enzymes of B Cells and Monocytes as Novel Markers to Discriminate Improvement Categories and to Fulfill Two Remission Definitions in Rheumatoid Arthritis
Source: MDPI journal article supplement (doi:10.3390/ijms241612998), 2023-08-20
Supplement: s1 [file s1]

**[Supplementary Tables and Figures]**

**Sialic-acid-related enzymes of B cells and monocytes as novel markers to discriminate improvement categories and to fulfill two remission definitions in rheumatoid arthritis**

Lieh-bang Liou, Ping-Han Tsai, Yao-Fan Fang, Yen-Fu Chen, Chih-chieh Chen, Jenn-Haung Lai

**Supplementary Table S1.** Comparing difference of B-cell and monocyte enzyme levels and ratios between the SDAI improvement group and the non-improvement group in RA patients with positive rheumatoid factor.

|        | <b>B-cell<br/>ST3</b>                     | <b>B-cell<br/>Neu3</b>                                          | <b>B-cell<br/>ST6</b>                                           | <b>B-cell<br/>Neu1</b>                    | <b>Mono<br/>ST3</b> | <b>Mono<br/>Neu3</b> | <b>Mono<br/>ST6</b> | <b>Mono<br/>Neu1</b> | <b>B-cell<br/>ST3/Neu3</b> | <b>B-cell<br/>ST6/Neu1</b> | <b>Mono<br/>ST3/Neu3</b> | <b>Mono<br/>ST6/Neu1</b> |
|--------|-------------------------------------------|-----------------------------------------------------------------|-----------------------------------------------------------------|-------------------------------------------|---------------------|----------------------|---------------------|----------------------|----------------------------|----------------------------|--------------------------|--------------------------|
| M0-M3  | 0.038 <sup>#</sup>                        | 0.010 <sup>#</sup>                                              | -                                                               | -                                         | -                   | -                    | -                   | -                    | -                          | -                          | -                        | -                        |
| M0-M12 | <0.001 <sup>*</sup><br>0.007 <sup>#</sup> | <0.001 <sup>*</sup><br>0.002 <sup>#</sup><br>0.045 <sup>@</sup> | <0.001 <sup>*</sup><br>0.045 <sup>#</sup><br>0.050 <sup>@</sup> | <0.001 <sup>*</sup><br>0.043 <sup>@</sup> | -                   | <0.001 <sup>*</sup>  | 0.006 <sup>*</sup>  | <0.001 <sup>*</sup>  | -                          | -                          | -                        | 0.001 <sup>@</sup>       |
| M0-M15 | -                                         | -                                                               | -                                                               | -                                         | -                   | 0.036 <sup>#</sup>   | -                   | -                    | -                          | -                          | -                        | -                        |

Shown are *P*-values; “-” indicates *P*-values > 0.05. SDAI: Simplified Disease Activity Index; RA: rheumatoid arthritis; ST3: alpha-2,3-sialyltransferase I; Neu3: neuraminidase 3; ST6: alpha-2,6-sialyltransferase I; Neu1: neuraminidase 1; ST3/Neu3: alpha-2,3-sialyltransferase I/neuraminidase 3 ratios; ST6/Neu1: alpha-2,6-sialyltransferase I/neuraminidase 1 ratios; Mono: monocyte. The SDAI improvement was calculated with 50%<sup>\*</sup>, 70%<sup>#</sup> and 85%<sup>@</sup> reduction among groups with Month 0 minus Month 3 (M0-M3), M0 minus M12 (M0-M12), and M0 minus M15 (M0-M15). The non-improvement refers to those with less than 50%, 70%, and 85% reduction. Then, the difference of separate enzyme levels and ratios in fulfillment vs. non-fulfillment was compared to obtain *P*-values. All comparisons were done by Mann-Whitney U test.

**Supplementary Table S2.** Comparing difference of B-cell and monocyte enzyme levels and ratios between the SDAI improvement group and the non-improvement group in RA patients with positive anti-CCP antibodies.

|        | <b>B-cell<br/>ST3</b> | <b>B-cell<br/>Neu3</b> | <b>B-cell<br/>ST6</b> | <b>B-cell<br/>Neu1</b> | <b>Mono<br/>ST3</b> | <b>Mono<br/>Neu3</b> | <b>Mono<br/>ST6</b> | <b>Mono<br/>Neu1</b> | <b>B-cell<br/>ST3/Neu3</b> | <b>B-cell<br/>ST6/Neu1</b> | <b>Mono<br/>ST3/Neu3</b> | <b>Mono<br/>ST6/Neu1</b> |
|--------|-----------------------|------------------------|-----------------------|------------------------|---------------------|----------------------|---------------------|----------------------|----------------------------|----------------------------|--------------------------|--------------------------|
| M0-M3  | 0.047 <sup>#</sup>    | 0.032 <sup>#</sup>     | -                     | 0.030 <sup>#</sup>     | -                   | -                    | -                   | -                    | -                          | -                          | -                        | -                        |
| M0-M12 | 0.005 <sup>*</sup>    | 0.007 <sup>*</sup>     | 0.003 <sup>*</sup>    | <0.001 <sup>*</sup>    | -                   | 0.001 <sup>*</sup>   | 0.040 <sup>*</sup>  | <0.001 <sup>*</sup>  | 0.021 <sup>*</sup>         | -                          | -                        | 0.008 <sup>@</sup>       |
|        | 0.019 <sup>#</sup>    | 0.005 <sup>#</sup>     |                       | 0.014 <sup>#</sup>     |                     |                      |                     |                      |                            |                            |                          |                          |
| M0-M15 | -                     | -                      | -                     | -                      | -                   | -                    | 0.017 <sup>@</sup>  | -                    | -                          | -                          | -                        | -                        |

Shown are *P*-values; “-” indicates *P*-values > 0.05. Anti-CCP antibodies: anti-cyclic citrullinated peptide antibodies; all other abbreviations: see Supplementary Table S1. The SDAI improvement was calculated with 50%<sup>\*</sup>, 70%<sup>#</sup> and 85%<sup>@</sup> reduction among groups with Month 0 minus Month 3 (M0-M3), M0 minus M12 (M0-M12), and M0 minus M15 (M0-M15). The non-improvement refers to those with less than 50%, 70%, and 85% reduction. Then, the difference of separate enzyme levels and ratios in fulfillment vs. non-fulfillment was compared to obtain *P*-values. All comparisons were done by Mann-Whitney U test.

**Supplementary Table S3.** Comparing difference of B-cell and monocyte enzyme levels and ratios between the SDAI improvement group and the non-improvement group in RA patients with use of biologics.

|        | <b>B-cell</b> | <b>B-cell</b> | <b>B-cell</b> | <b>B-cell</b>      | <b>Mono</b> | <b>Mono</b> | <b>Mono</b> | <b>Mono</b> | <b>B-cell</b>   | <b>B-cell</b>   | <b>Mono</b>        | <b>Mono</b>     |
|--------|---------------|---------------|---------------|--------------------|-------------|-------------|-------------|-------------|-----------------|-----------------|--------------------|-----------------|
|        | <b>ST3</b>    | <b>Neu3</b>   | <b>ST6</b>    | <b>Neu1</b>        | <b>ST3</b>  | <b>Neu3</b> | <b>ST6</b>  | <b>Neu1</b> | <b>ST3/Neu3</b> | <b>ST6/Neu1</b> | <b>ST3/Neu3</b>    | <b>ST6/Neu1</b> |
| M0-M3  | -             | 0.022*        | -             | 0.037*             | -           | -           | -           | -           | -               | -               | -                  | 0.007*          |
| M0-M12 | -             | -             | -             | 0.022 <sup>#</sup> | -           | -           | -           | -           | -               | -               | 0.005 <sup>@</sup> | -               |
| M0-M15 | -             | -             | -             | -                  | -           | -           | -           | -           | -               | -               | -                  | -               |

Shown are *P*-values; “-” indicates *P*-values > 0.05. All abbreviations: see Supplementary Table S1. The SDAI improvement was calculated with 50%\*, 70%<sup>#</sup> and 85%<sup>@</sup> reduction among groups with Month 0 minus Month 3 (M0-M3), M0 minus M12 (M0-M12), and M0 minus M15 (M0-M15). The non-improvement refers to those with less than 50%, 70%, and 85% reduction. Then, the difference of separate enzyme levels and ratios in fulfillment vs. non-fulfillment was compared to obtain *P*-values. All comparisons were done by Mann-Whitney U test.

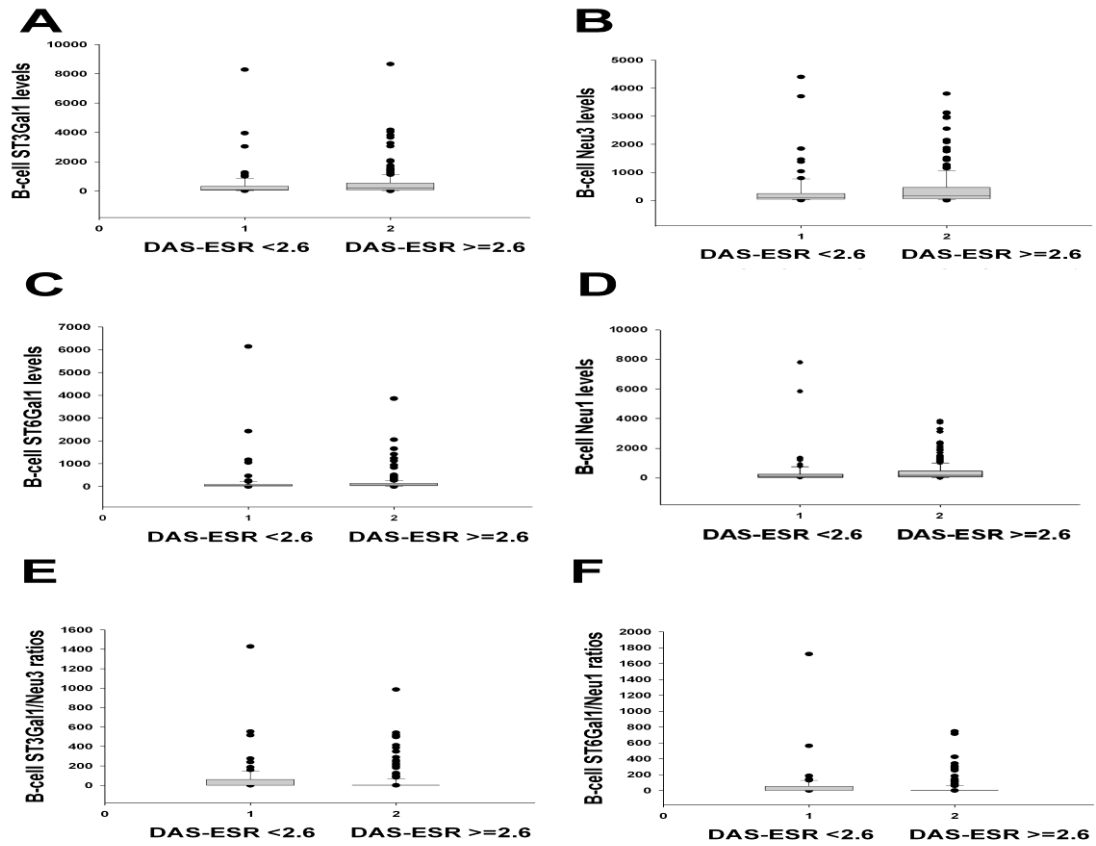

**Supplementary Figure S1.** Comparison of B-cell sialyltransferase and neuraminidase levels between DAS28-ESR remission and non-remission categories. All comparisons were analysed by Mann–Whitney U test. Visit numbers were 73 for DAS-ESR < 2.6 and 230-238 for DAS-ESR  $\geq$  2.6; the non-uniform latter is due to some smaller-group staining adjustment for the first several patients and some non-calculable ratios with zero enzyme levels as the denominator. (A) B-cell  $\alpha$ -2,3-sialyltransferase I levels (B-cell ST3Gal1 level is the mean fluorescence intensity of cell enzyme staining) were compared between DAS-ESR < 2.6 and DAS-ESR  $\geq$  2.6 (higher):  $P = 0.005$ . (B) B-cell neuraminidase 3 (Neu3) levels were compared between DAS-ESR < 2.6 and DAS-ESR  $\geq$  2.6 (higher):  $P = 0.005$ . (C) B-cell  $\alpha$ -2,6-sialyltransferase I levels (B-cell ST6Gal1 levels) were compared between DAS-ESR < 2.6 and DAS-ESR  $\geq$  2.6 (higher):  $P = 0.015$ . (D) B-cell neuraminidase 1 (Neu1) levels were compared between DAS-ESR < 2.6 and DAS-ESR  $\geq$  2.6 (higher):  $P = 0.002$ . (E) B-cell ST3Gal1/Neu3 ratios were compared between DAS-ESR < 2.6 (higher) and DAS-ESR  $\geq$  2.6:  $P < 0.001$ . (F) B-cell ST6Gal1/Neu1 ratios were compared between DAS-ESR < 2.6 (higher) and DAS-ESR  $\geq$  2.6:  $P = 0.002$ .

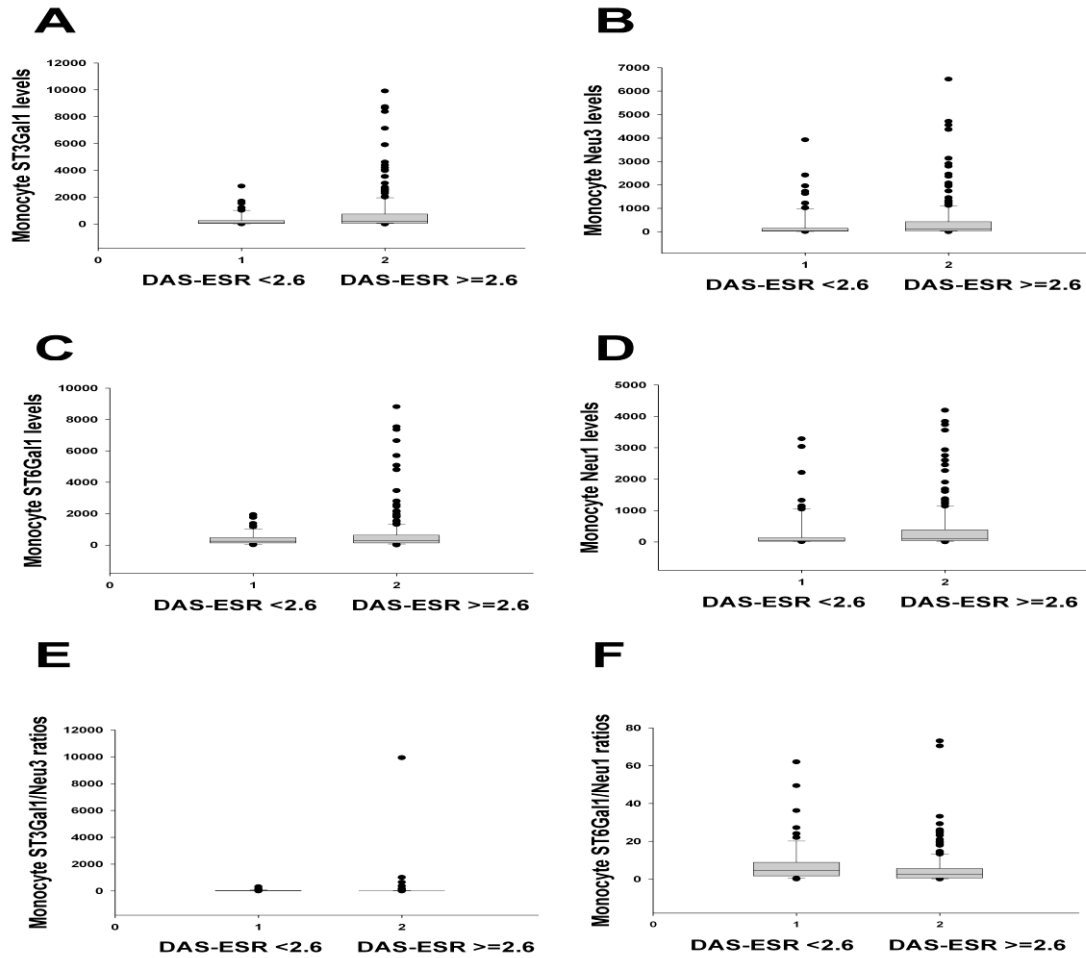

**Supplementary Figure S2.** Comparison of monocyte sialyltransferase and neuraminidase levels between DAS28-ESR remission and non-remission categories. All comparisons were analysed by Mann–Whitney U test. Visit numbers were 73 for DAS-ESR< 2.6 and 231-238 for DAS-ESR ≥ 2.6. (A) Monocyte  $\alpha$ -2,3-sialyltransferase I levels (monocyte ST3Gal1 levels) were compared between DAS-ESR< 2.6 and DAS-ESR ≥ 2.6 (higher):  $P < 0.001$ . (B) Monocyte neuraminidase 3 (Neu3) levels were compared between DAS-ESR< 2.6 and DAS-ESR ≥ 2.6 (higher):  $P = 0.001$ . (C) Monocyte  $\alpha$ -2,6-sialyltransferase I levels (monocyte ST6Gal1 levels) were compared between DAS-ESR< 2.6 and DAS-ESR ≥ 2.6 (higher):  $P = 0.166$ . (D) Monocyte neuraminidase 1 (Neu1) levels were compared between DAS-ESR< 2.6 and DAS-ESR ≥ 2.6 (higher):  $P < 0.001$ . (E) Monocyte ST3Gal1/Neu3 ratios were compared between DAS-ESR< 2.6 (higher) and DAS-ESR ≥ 2.6:  $P = 0.004$ . (F) Monocyte ST6Gal1/Neu1 ratios were compared between DAS-ESR< 2.6 (higher) and DAS-ESR ≥ 2.6:  $P = 0.002$ .

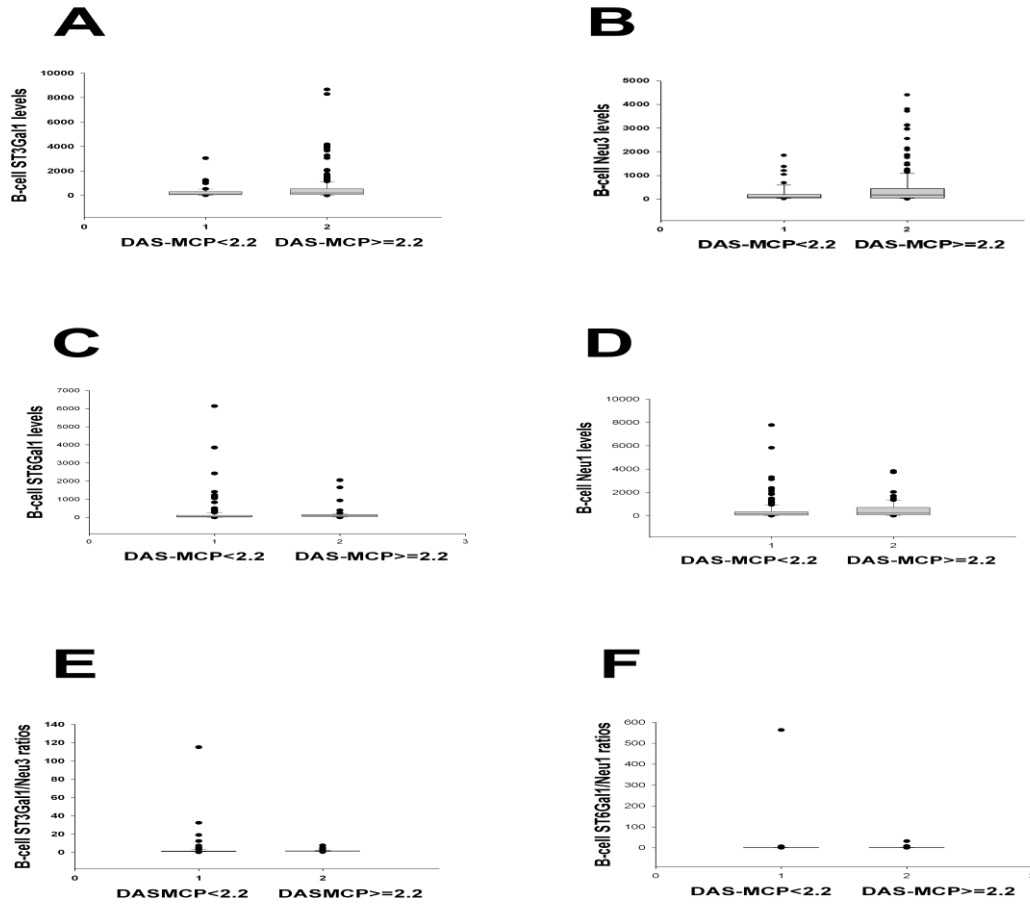

**Supplementary Figure S3.** Comparison of B-cell sialyltransferase and neuraminidase levels between DAS28-MCP-1 remission and non-remission categories. All comparisons were analysed by Mann–Whitney U test. Visit numbers were 55 for DAS-MCP-1 < 2.6 and 244-253 for DAS-MCP-1 ≥ 2.6; the non-uniform latter is due to some smaller-group staining adjustment for the first several patients and some non-calculable ratios with zero enzyme levels as the denominator. (A) B-cell ST3Gal1 levels (mean fluorescence intensity of cell enzyme staining) were compared between DAS-MCP < 2.2 and DAS-MCP ≥ 2.2 (higher):  $P = 0.009$ . (B) B-cell neuraminidase 3 (Neu3) levels were compared between DAS-MCP < 2.2 and DAS-MCP ≥ 2.2 (higher):  $P = 0.004$ . (C) B-cell ST6Gal1 levels were compared between DAS-MCP < 2.2 and DAS-MCP ≥ 2.2 (higher):  $P = 0.043$ . (D) B-cell neuraminidase 1 (Neu1) levels were compared between DAS-MCP < 2.2 and DAS-MCP ≥ 2.2 (higher):  $P = 0.001$ . (E) B-cell ST3Gal1/Neu3 ratios were compared between DAS-MCP < 2.2 and DAS-MCP ≥ 2.2:  $P = 0.174$ . (F) B-cell ST6Gal1/Neu1 ratios were compared between DAS-MCP < 2.2 and DAS-MCP ≥ 2.2:  $P = 0.845$ .

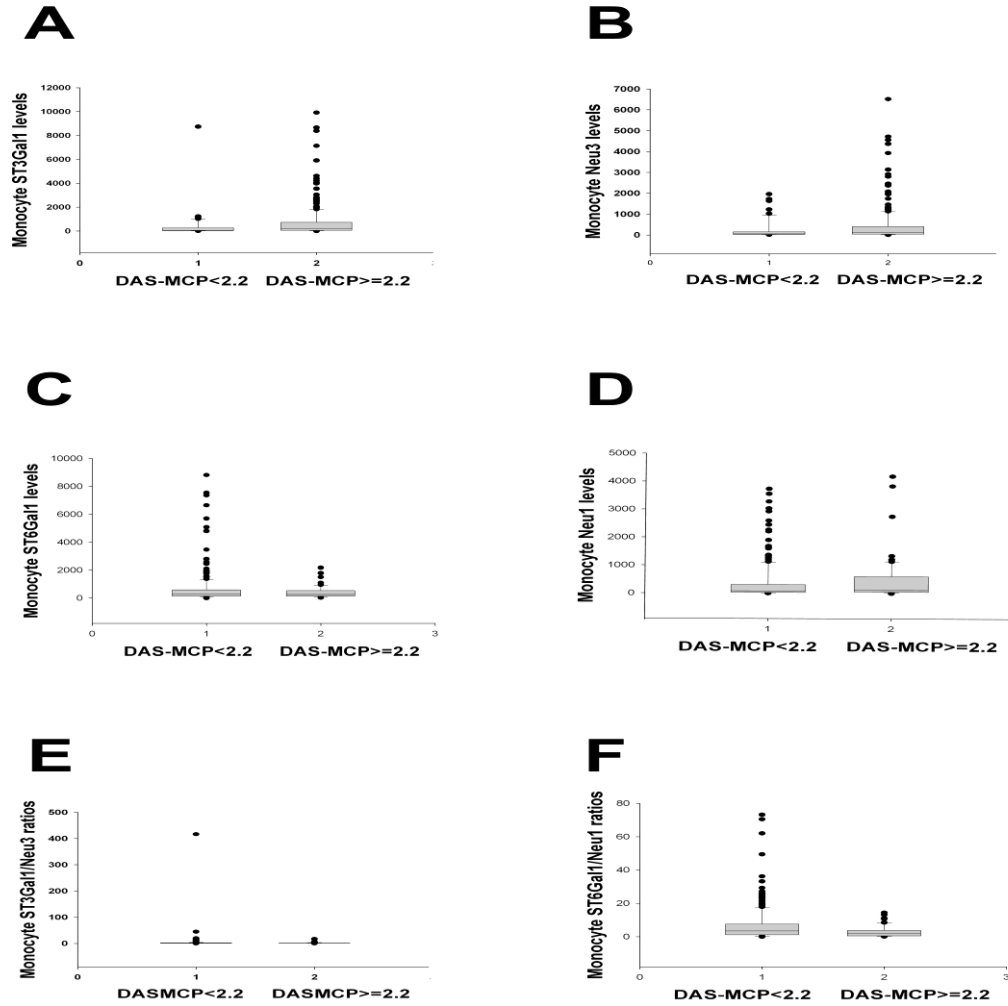

**Supplementary Figure S4.** Comparison of monocyte sialyltransferase and neuraminidase levels between DAS28-MCP-1 remission and non-remission categories. All comparisons were analysed by Mann–Whitney U test. Visit numbers were 55 for DAS-MCP-1 < 2.6 and 244-253 for DAS-MCP-1 ≥ 2.6. (A) Monocyte ST3Gal1 levels were compared between DAS-MCP < 2.2 and DAS-MCP ≥ 2.2 (higher):  $P < 0.001$ . (B) Monocyte neuraminidase 3 (Neu3) levels were compared between DAS-MCP < 2.2 and DAS-MCP ≥ 2.2 (higher):  $P = 0.001$ . (C) Monocyte ST6Gal1 levels were compared between DAS-MCP < 2.2 and DAS-MCP ≥ 2.2:  $P = 0.718$ . (D) Monocyte neuraminidase 1 (Neu1) levels were compared between DAS-MCP < 2.2 and DAS-MCP ≥ 2.2 (higher):  $P = 0.001$ . (E) Monocyte ST3Gal1/Neu3 ratios were compared between DAS-MCP < 2.2 and DAS-MCP ≥ 2.2:  $P = 0.374$ . (F) Monocyte ST6Gal1/Neu1 ratios were compared between DAS-MCP < 2.2 (higher) and DAS-MCP ≥ 2.2:  $P = 0.003$ .

**Supplementary Table S4.** Individual data for those hard-to-visualize differences clearly in Figures S1 to S2.

|                                                                | Number | 25 <sup>th</sup> percentile | Median | 75 <sup>th</sup> percentile |
|----------------------------------------------------------------|--------|-----------------------------|--------|-----------------------------|
| Fig. S1C: B-cell<br>ST6 for<br>DASESR<2.6                      | 73     | 18.65                       | 40.40  | 86.05                       |
| Fig. S1C: B-cell<br>ST6 for<br>DASESR $\geq$ 2.6               | 238    | 30.75                       | 64.70  | 143.25                      |
| Fig. S1D: B-cell<br>Neu1 for<br>DASESR<2.6                     | 73     | 39.45                       | 89.40  | 236.50                      |
| Fig. S1D: B-cell<br>Neu1 for<br>DASESR $\geq$ 2.6              | 238    | 62.75                       | 184.00 | 448.50                      |
| Fig. S1E: B-cell<br>ST3Gal1/Neu3 for<br>DASESR<2.6             | 73     | 1.00                        | 1.40   | 60.15                       |
| Fig. S1E: B-cell<br>ST3Gal1/Neu3 for<br>DASESR $\geq$ 2.6      | 238    | 0.70                        | 1.10   | 2.10                        |
| Fig. S1F: B-cell<br>ST6Gal1/Neu1 for<br>DASESR<2.6             | 73     | 0.30                        | 0.60   | 53.35                       |
| Fig. S1F: B-cell<br>ST3Gal1/Neu3 for<br>DASESR $\geq$ 2.6      | 238    | 0.20                        | 0.40   | 1.60                        |
| Fig. S2E:<br>Monocyte<br>ST3Gal1/Neu3 for<br>DASESR<2.6        | 73     | 1.15                        | 2.20   | 31.50                       |
| Fig. S2E:<br>Monocyte<br>ST3Gal1/Neu3 for<br>DASESR $\geq$ 2.6 | 238    | 0.90                        | 1.40   | 3.10                        |

Data under percentile and median columns indicate mean staining fluorescence levels.



**Supplementary Table S5.** Individual data for those hard-to-visualize differences clearly in Figures S3 to S4.

|                                                                | Number | 25 <sup>th</sup> percentile | Median | 75 <sup>th</sup> percentile |
|----------------------------------------------------------------|--------|-----------------------------|--------|-----------------------------|
| Fig. S3C: B-cell<br>ST6Gal1 for<br>DASMCP<2.2                  | 250    | 21.38                       | 55.55  | 121.25                      |
| Fig. S3C: B-cell<br>ST6Gal1 for<br>DASMCP $\geq$ 2.2           | 59     | 40.20                       | 76.60  | 160.00                      |
| Fig. S3E: B-cell<br>ST3Gal1/Neu3 for<br>DASMCP<2.2             | 243    | 0.760                       | 1.070  | 1.460                       |
| Fig. S3E: B-cell<br>ST3Gal1/Neu3 for<br>DASMCP $\geq$ 2.2      | 55     | 0.920                       | 1.150  | 1.650                       |
| Fig. S3F: B-cell<br>ST6Gal1/Neu1 for<br>DASMCP<2.2             | 250    | 0.138                       | 0.350  | 0.770                       |
| Fig. S3F: B-cell<br>ST6Gal1/Neu1 for<br>DASMCP $\geq$ 2.2      | 57     | 0.145                       | 0.340  | 0.940                       |
| Fig. S4C:<br>Monocyte ST6Gal1<br>for DASMCP<2.2                | 250    | 126.75                      | 296.00 | 579.25                      |
| Fig. S4C:<br>Monocyte ST6Gal1<br>for DASMCP $\geq$ 2.2         | 58     | 137.50                      | 255.00 | 534.00                      |
| Fig. S4E:<br>Monocyte<br>ST3Gal1.Neu3 for<br>DASMCP<2.2        | 243    | 0.960                       | 1.370  | 2.480                       |
| Fig. S4E:<br>Monocyte<br>ST3Gal1.Neu3 for<br>DASMCP $\geq$ 2.2 | 55     | 0.860                       | 1.250  | 2.220                       |

Data under percentile and median columns indicate mean staining fluorescence levels.
